# Supplementary material for: Development of spirulina for the manufacture and oral delivery of protein therapeutics
Source: PubMed Central journal article supplement (PMC9200632; doi:10.1038/s41587-022-01249-7), 2022-03-21
Supplement: 41587_2022_1249_MOESM1_ESM.pdf [file 41587_2022_1249_MOESM1_ESM.pdf]

**Supplementary information**

---

**Development of spirulina for the  
manufacture and oral delivery of protein  
therapeutics**

---

In the format provided by the  
authors and unedited

1

| Preferred Term (PT)                     | LMN-101 Overall<br>(N=15)<br>n (%) | Placebo (N=6)<br>n (%) | Overall (N=21)<br>n (%) |
|-----------------------------------------|------------------------------------|------------------------|-------------------------|
| <b>Subjects with at least one TEAE</b>  | <b>5 (33.3%)</b>                   | <b>3 (50.0%)</b>       | <b>8 (38.1%)</b>        |
| Abdominal pain                          | 1 (6.7%)                           | 0                      | 1 (4.8%)                |
| Abdominal pain lower                    | 1 (6.7%)                           | 0                      | 1 (4.8%)                |
| Constipation                            | 1 (6.7%)                           | 0                      | 1 (4.8%)                |
| Diarrhea                                | 1 (6.7%)                           | 0                      | 1 (4.8%)                |
| Gastrointestinal sounds abnormal        | 0                                  | 1 (16.7%)              | 1 (4.8%)                |
| Gastroesophageal reflux disease         | 1 (6.7%)                           | 0                      | 1 (4.8%)                |
| Nausea                                  | 1 (6.7%)                           | 0                      | 1 (4.8%)                |
| Vessel puncture site bruise             | 1 (6.7%)                           | 0                      | 1 (4.8%)                |
| Lower respiratory tract infection viral | 1 (6.7%)                           | 0                      | 1 (4.8%)                |
| Pharyngitis                             | 1 (6.7%)                           | 0                      | 1 (4.8%)                |
| Viral infection                         | 0                                  | 1 (16.7%)              | 1 (4.8%)                |
| Viral upper respiratory tract infection | 1 (6.7%)                           | 0                      | 1 (4.8%)                |
| Headache                                | 0                                  | 1 (16.7%)              | 1 (4.8%)                |
| Anxiety                                 | 0                                  | 1 (16.7%)              | 1 (4.8%)                |
| Menstruation delayed                    | 1 (6.7%)                           | 0                      | 1 (4.8%)                |

2

3 **Supplemental Table S3.** Frequency and type of treatment-associated events in LMN-101 and  
4 placebo treated patients during the 29-day trial. All events were considered mild (grade 1).  
5 Evaluation by the trial physician indicated that none of these mild events were probably  
6 associated with treatment. Shown are the number of patients reporting an event (n), and the  
7 percentage of patients reporting an event (%).

8

9 **Supplemental references**

10  
11  
12  
  
13  
14  
  
15  
16  
  
17  
18  
  
19  
20  
  
21  
22  
23  
  
24  
25  
26  
  
27  
28  
29  
  
30  
31  
  
32

53. Taton, A. *et al.* The circadian clock and darkness control natural competence in cyanobacteria. *Nature Communications* 11, 1099–11 (2020).

54. Wrapp, D. *et al.* Structural Basis for Potent Neutralization of Betacoronaviruses by Single-Domain Camelid Antibodies. *Cell* 181, 1436–1441 (2020).

55. Zimmermann, I., Egloff, P., Hutter, C. & Elife, F. A. Synthetic single domain antibodies for the conformational trapping of membrane proteins. *elifesciences.org* doi:10.7554/elifesciences.34317.001.

56. Burgers, P. P. *et al.* Structure of smAKAP and its regulation by PKA-mediated phosphorylation. *FEBS J* 283, 2132–2148 (2016).

57. Correnti, C. E. *et al.* Engineering and functionalization of large circular tandem repeat protein nanoparticles. *Nat Struct Mol Biol* 27, 1–20 (2020).

58. Hofmeyer, T. *et al.* Arranged Sevenfold: Structural Insights into the C-Terminal Oligomerization Domain of Human C4b-Binding Protein. *Journal of Molecular Biology* 425, 1302–1317 (2013).

59. Garaicoechea, L. *et al.* Llama-Derived Single-Chain Antibody Fragments Directed to Rotavirus VP6 Protein Possess Broad Neutralizing Activity In Vitro and Confer Protection against Diarrhea in Mice. *J. Virol.* 82, 9753–9764 (2008).

60. Koromyslova, A. D. & Hansman, G. S. Nanobodies targeting norovirus capsid reveal functional epitopes and potential mechanisms of neutralization. *PLoS Pathog* 13, e1006636 (2017).

61. Yang, Z. *et al.* A novel multivalent, single-domain antibody targeting TcdA and TcdB prevents fulminant *Clostridium difficile* infection in mice. *J. Infect. Dis.* 210, 964–972 (2014).
